# Supplementary material
Source: PubMed Central journal article supplement (PMC6736755)
Supplement: NIHMS1534472-supplement-1.pdf [file NIHMS1534472-supplement-1.pdf]

| Peptide name              | Peptide mass calculated [M+H] | Peptide mass observed | Purity (%) | OT-II (I-A <sup>b</sup> ), IFN $\gamma$ response<br>10 $\mu$ M peptide, ELISpot |     | DO11.10 (I-A <sup>d</sup> ), IL2 response<br>10 $\mu$ M peptide, ELISA |              |      |       |
|---------------------------|-------------------------------|-----------------------|------------|---------------------------------------------------------------------------------|-----|------------------------------------------------------------------------|--------------|------|-------|
|                           |                               |                       |            | Average                                                                         | SD  | Mean                                                                   | SD           |      |       |
| WT                        | 1773.9                        | 1773.7                | >95        |                                                                                 |     |                                                                        |              |      |       |
| 323                       | 1787.9                        | 1787.9                | >95        | WT                                                                              | 362 | 45                                                                     | WT           | 1.23 | 0.082 |
| 323-2                     | 1787.9                        | 1788.2                | >95        | 323                                                                             | 351 | 35                                                                     | 323          | 1.12 | 0.064 |
| 324                       | 1787.9                        | 1788.1                | >95        | 323-2                                                                           | 357 | 72                                                                     | 323-2        | 1.22 | 0.004 |
| 325                       | 1787.9                        | 1788.3                | 88         | 324                                                                             | 295 | 107                                                                    | 324          | 1.26 | 0.077 |
| 326                       | 1787.9                        | 1788.5                | 92         | 325                                                                             | 368 | 51                                                                     | 325          | 1.31 | 0.043 |
| 326-2                     | 1787.9                        | 1787.6                | >95        | 326                                                                             | 383 | 42                                                                     | 326          | 1.23 | 0.217 |
| 327                       | 1787.9                        | 1789.3                | >95        | 326-2                                                                           | ND  |                                                                        | 326-2        | ND   |       |
| 327-2                     | 1787.9                        | 1788.2                | >95        | 327                                                                             | 381 | 80                                                                     | 327          | 1.18 | 0.066 |
| 329                       | 1787.9                        | 1788.7                | >95        | 327-2                                                                           | 343 | 105                                                                    | 327-2        | 0.77 | 0.073 |
| 329-2                     | 1787.9                        | 1788.1                | >95        | 329                                                                             | 106 | 41                                                                     | 329          | 0.29 | 0.070 |
| 330                       | 1787.9                        | 1788.6                | >95        | 329-2                                                                           | 93  | 14                                                                     | 329-2        | 0.28 | 0.048 |
| 330-2                     | 1787.9                        | 1787.9                | >95        | 330                                                                             | ND  |                                                                        | 330          | ND   |       |
| 332                       | 1787.9                        | 1788.2                | 92         | 330-2                                                                           | 177 | 29                                                                     | 330-2        | 0.17 | 0.000 |
| 332-2                     | 1787.9                        | 1787.8                | >95        | 332                                                                             | 22  | 10                                                                     | 332          | 1.16 | 0.064 |
| 333                       | 1787.9                        | 1788.2                | >95        | 332-2                                                                           | 198 | 64                                                                     | 332-2        | 0.20 | 0.006 |
| 334                       | 1787.9                        | 1788.2                | >95        | 333                                                                             | 7   | 1                                                                      | 333          | 0.13 | 0.014 |
| 334-2                     | 1787.9                        | 1787.6                | 77         | 334                                                                             | 11  | 12                                                                     | 334          | 0.19 | 0.009 |
| 335                       | 1787.9                        | 1788.3                | >95        | 334-2                                                                           | 13  | 6                                                                      | 334-2        | 0.15 | 0.006 |
| 336                       | 1787.9                        | 1788.2                | >95        | 335                                                                             | 53  | 16                                                                     | 335          | 0.50 | 0.037 |
| 337                       | 1787.9                        | 1788.1                | >95        | 336                                                                             | 8   | 7                                                                      | 336          | 0.92 | 0.060 |
| 337-2                     | 1787.9                        | 1787.9                | >95        | 337                                                                             | 339 | 56                                                                     | 337          | 1.18 | 0.012 |
| 338                       | 1787.9                        | 1788                  | >95        | 337-2                                                                           | 320 | 33                                                                     | 337-2        | 0.97 | 0.050 |
| G <sub>3</sub> -WT        | 1944                          | 1943.2                | >95        | 338                                                                             | 399 | 80                                                                     | 338          | 1.19 | 0.046 |
| 2 $\beta$                 | 1799.9                        | 1800.1                | 93         |                                                                                 |     |                                                                        | Background   | 0.14 | 0.003 |
| G <sub>3</sub> -3 $\beta$ | 1986                          | 1985.2                | 87         |                                                                                 |     |                                                                        | +++ is < 0.9 |      |       |

+++ is < 250 spots  
 ++ is 100<x<250 spots  
 + is 50<x<100 spots  
 - is <50 spots

+++ is < 0.9  
 ++ is 0.3<x<0.9  
 + is 0.2<x<0.3  
 - is <0.2

Supporting Figure 1: Tabulation of peptide analytical data (left) and T cell stimulation data (right). (Left) Observed peptide masses were recorded using mass spectrometry as described in the methods section. Peptide purities were quantified using C18 analytical HPLC. (Right) Averages represent the mean values from 4 independent experiments. SD indicates standard deviation. OT-II data represent the number of spots recorded in ELISpot assays. DO11.10 data represent the absorption recorded in an ELISA to measure media levels of IL2.

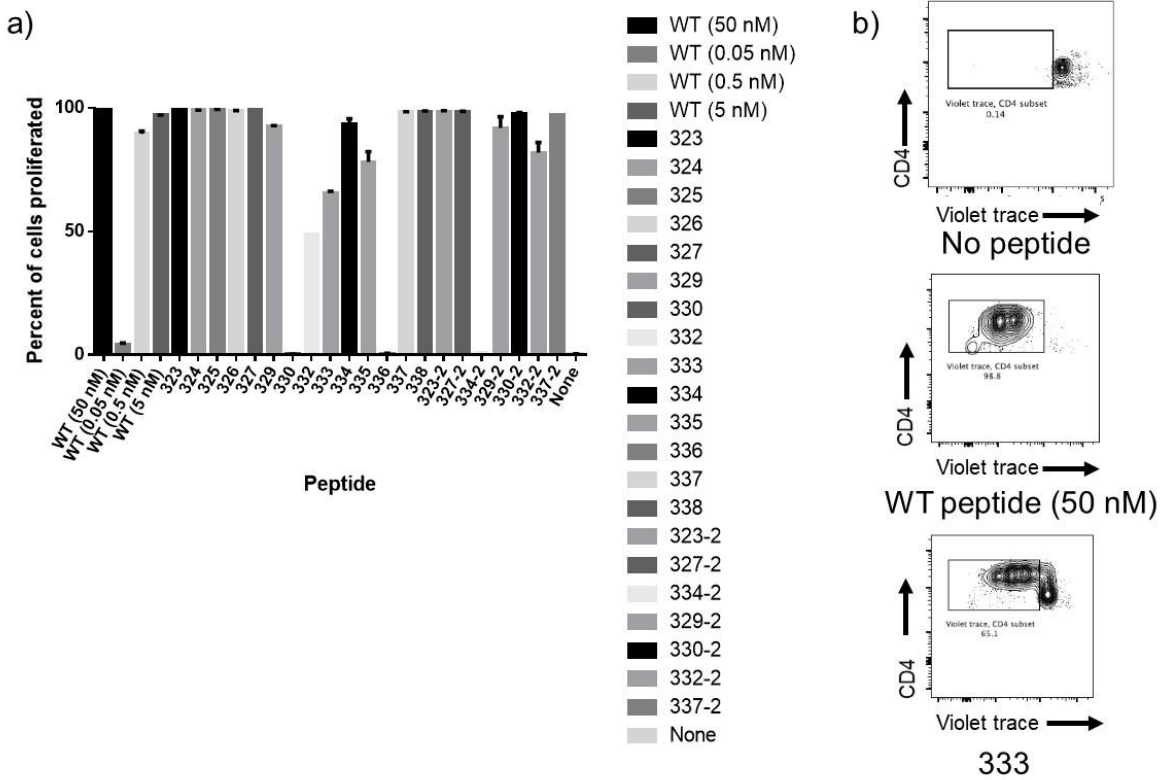

Supporting Figure 2: OT-II T cell proliferation induced by peptides. **(a)** Summary of OT-II proliferation in the presence of peptides at a dose indicated (50 nM, unless otherwise indicated). Proliferation was measured by flow cytometry as described in the methods section. Error bars represent standard deviation from replicate 2 or 3 experiments. **(b)** Representative flow cytometry plots measuring dye dilution of OT-II T cells in response to the peptide listed below the plot.

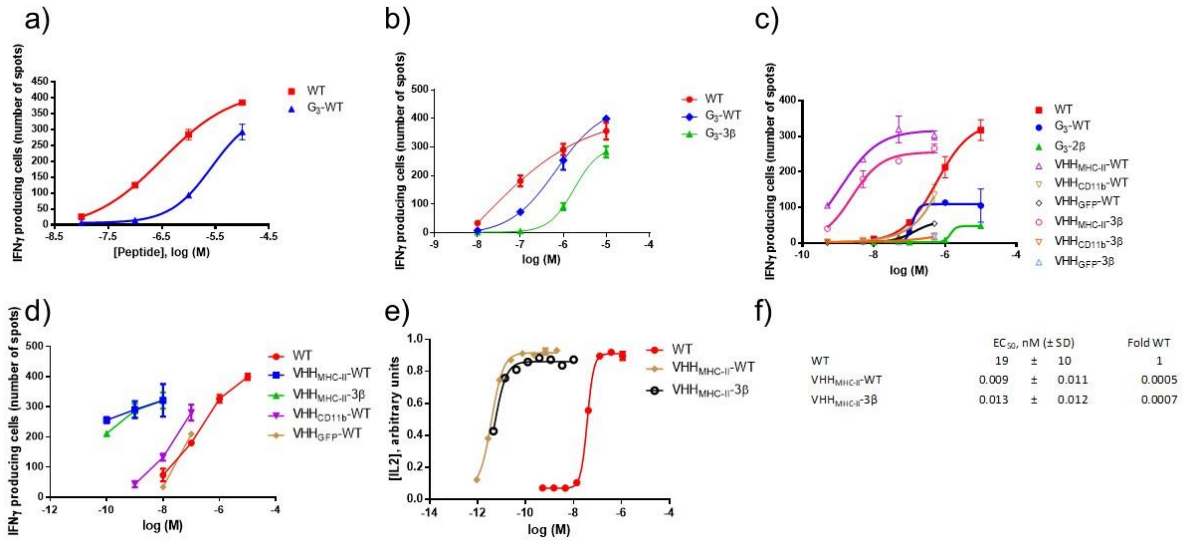

Supporting Figure 3. Effective stimulation of T cells by VHH<sub>MHC-II</sub>-peptide conjugates. **(a-d)** Dose-response curves for stimulation of IFN $\gamma$  release by peptides or VHH-peptide conjugates. Note that each of these panels have data from independent experiments. OT-II splenocytes were stimulated overnight and IFN $\gamma$  production was measured using ELISpot as described in the methods section. **(e)** Representative dose-response curve for stimulation of IL2 release from DO11.10 cells. Data points are mean  $\pm$  SD and curves result from the fitting of four parameter dose-response model. **(f)** Tabulation of dose-response values for peptides and active VHH-peptide conjugates. Data are from  $\geq 2$  independent experiments. Data in this table for WT are identical to those presented in Figure 3.

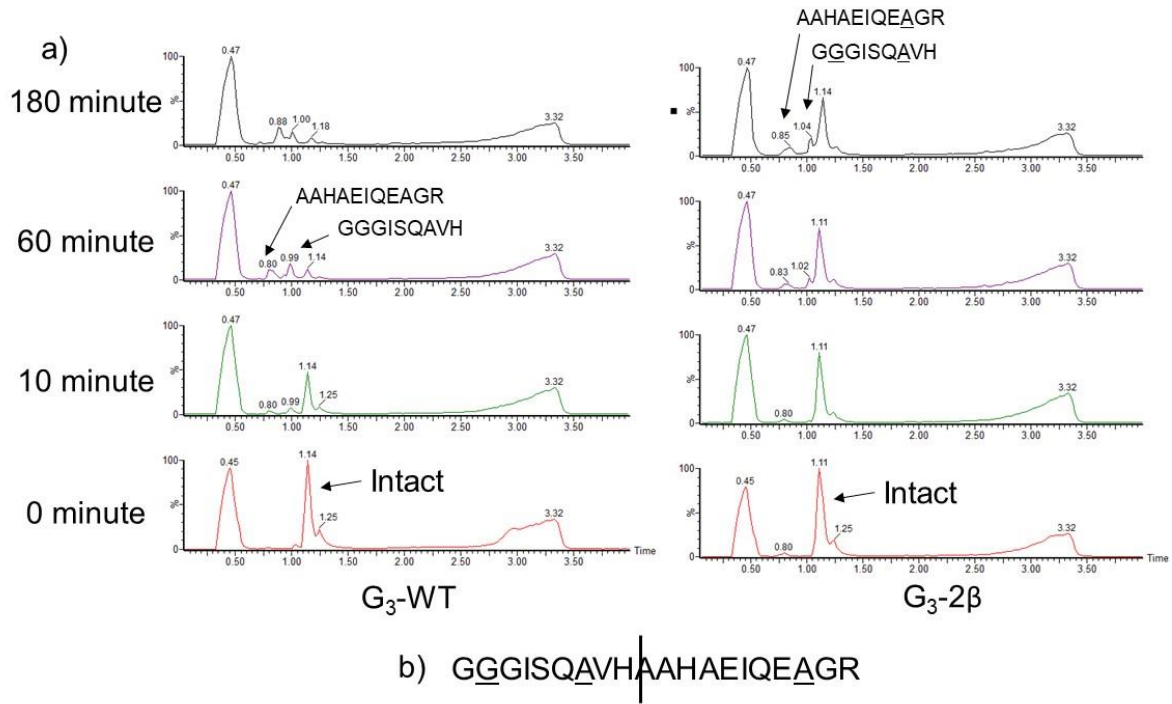

Supporting Figure 4: Characterization of peptide degradation by cathepsin S. **(a)** LC/MS spectra total ion chromatographs of peptides at indicated durations of incubation with protease. The peaks corresponding to the intact peptide and the fragments observed, as determined by mass spectra, are indicated in specific panels. Positions of  $\beta$ -residue incorporation are underlined. Retention times of peaks (m) are listed above the corresponding peaks. **(b)** Position of site of cleavage for each of the peptides tested. The bond cleavage by cathepsin S is indicated by the vertical line. Sites of  $\beta$ -residue incorporation in  $G_3$ -3 $\beta$  are underlined.
